# Supplementary material for: Epstein–Barr Virus Infection of Mammary Epithelial Cells Promotes Malignant Transformation
Source: PubMed Central journal article supplement — eBioMedicine. 2016 May 21;9:148–60. doi: 10.1016/j.ebiom.2016.05.025 (PMC4972522; doi:10.1016/j.ebiom.2016.05.025), 2016-05-21
Supplement: mmc1.pdf [file mmc1.pdf]

A

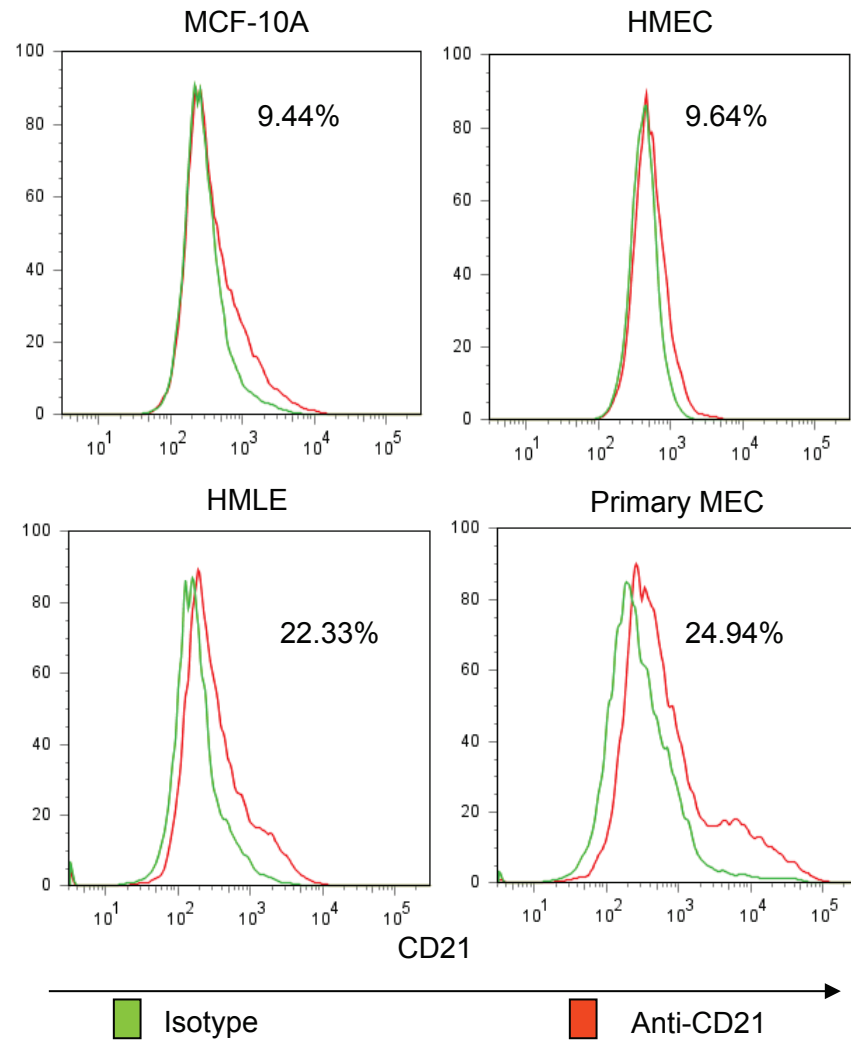

Fig.S1

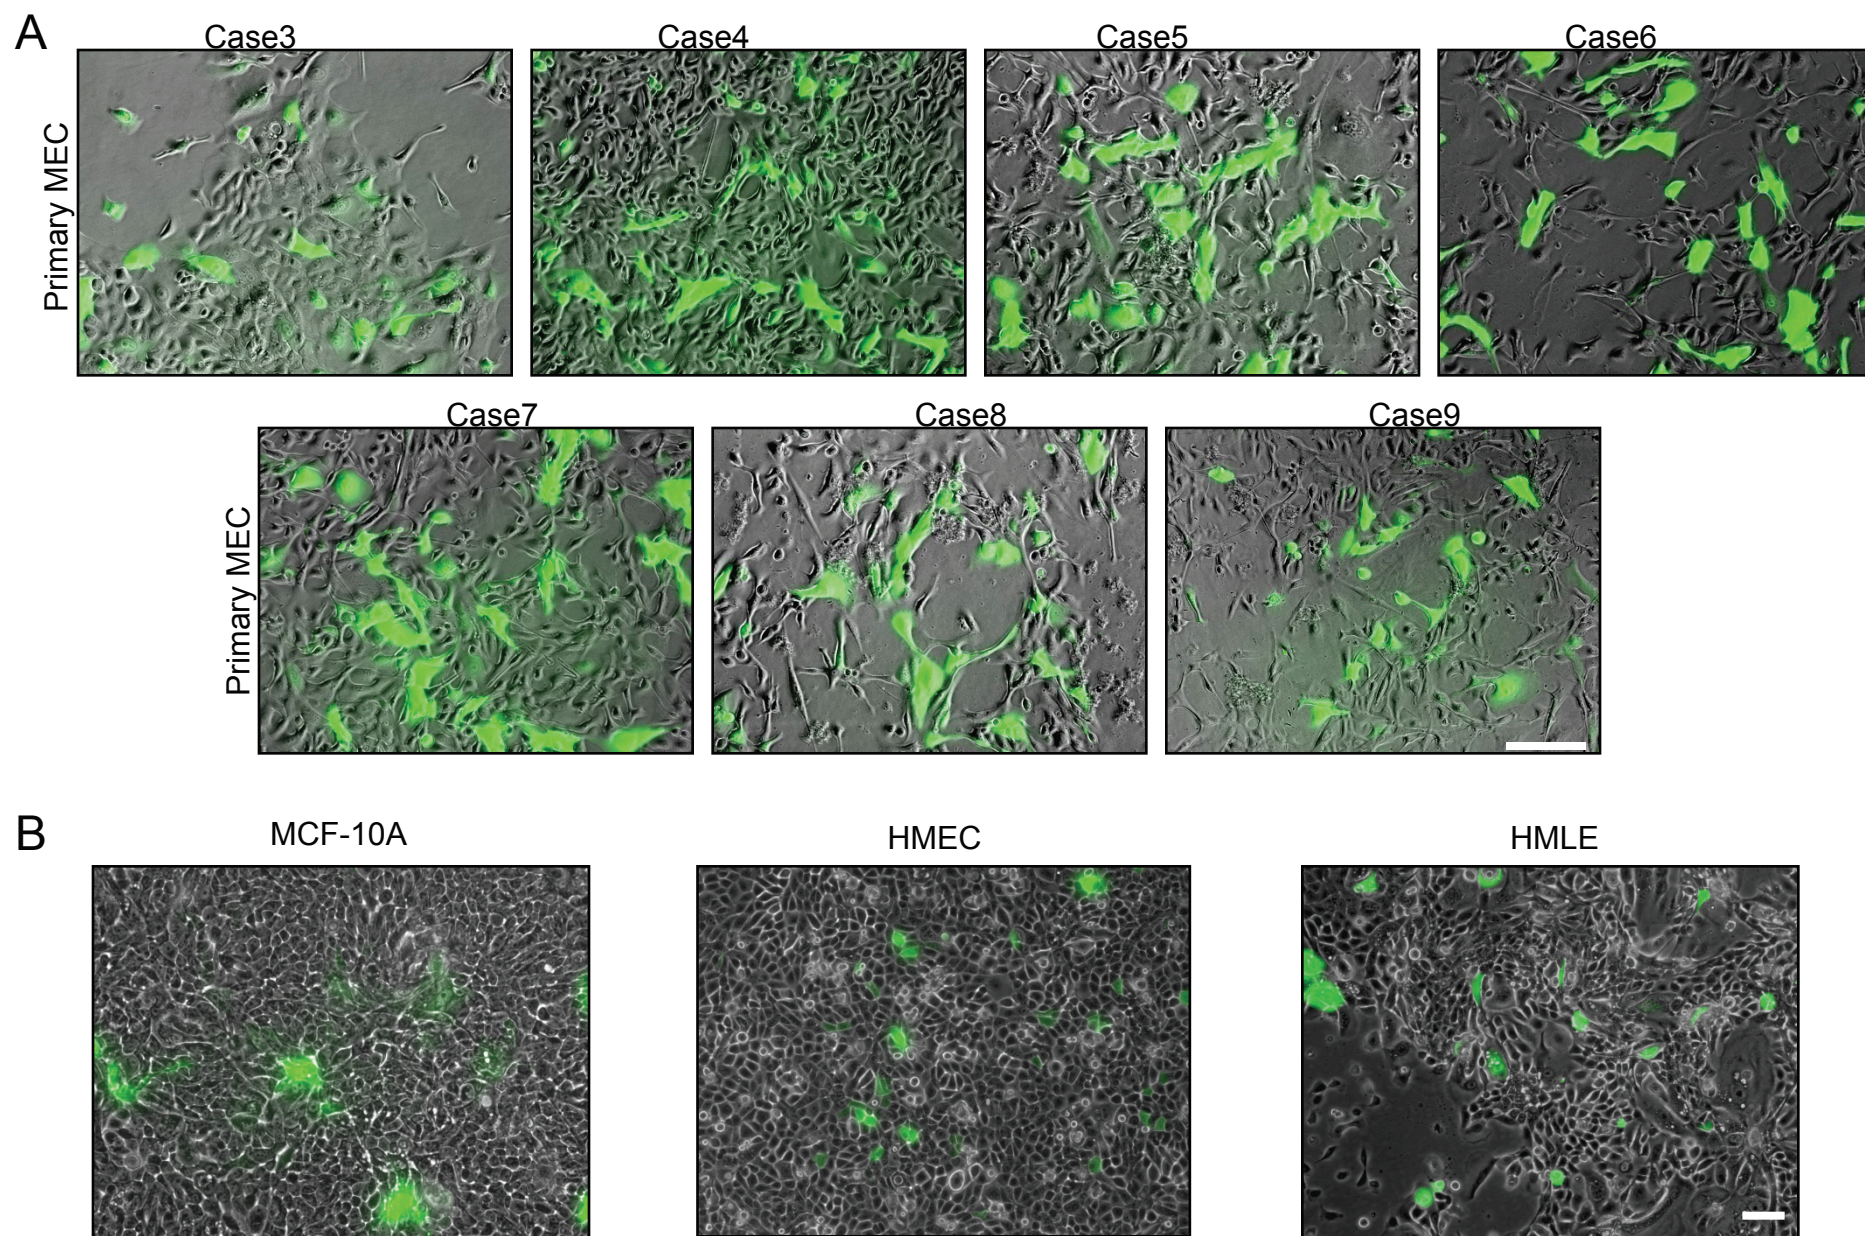

Fig. S2

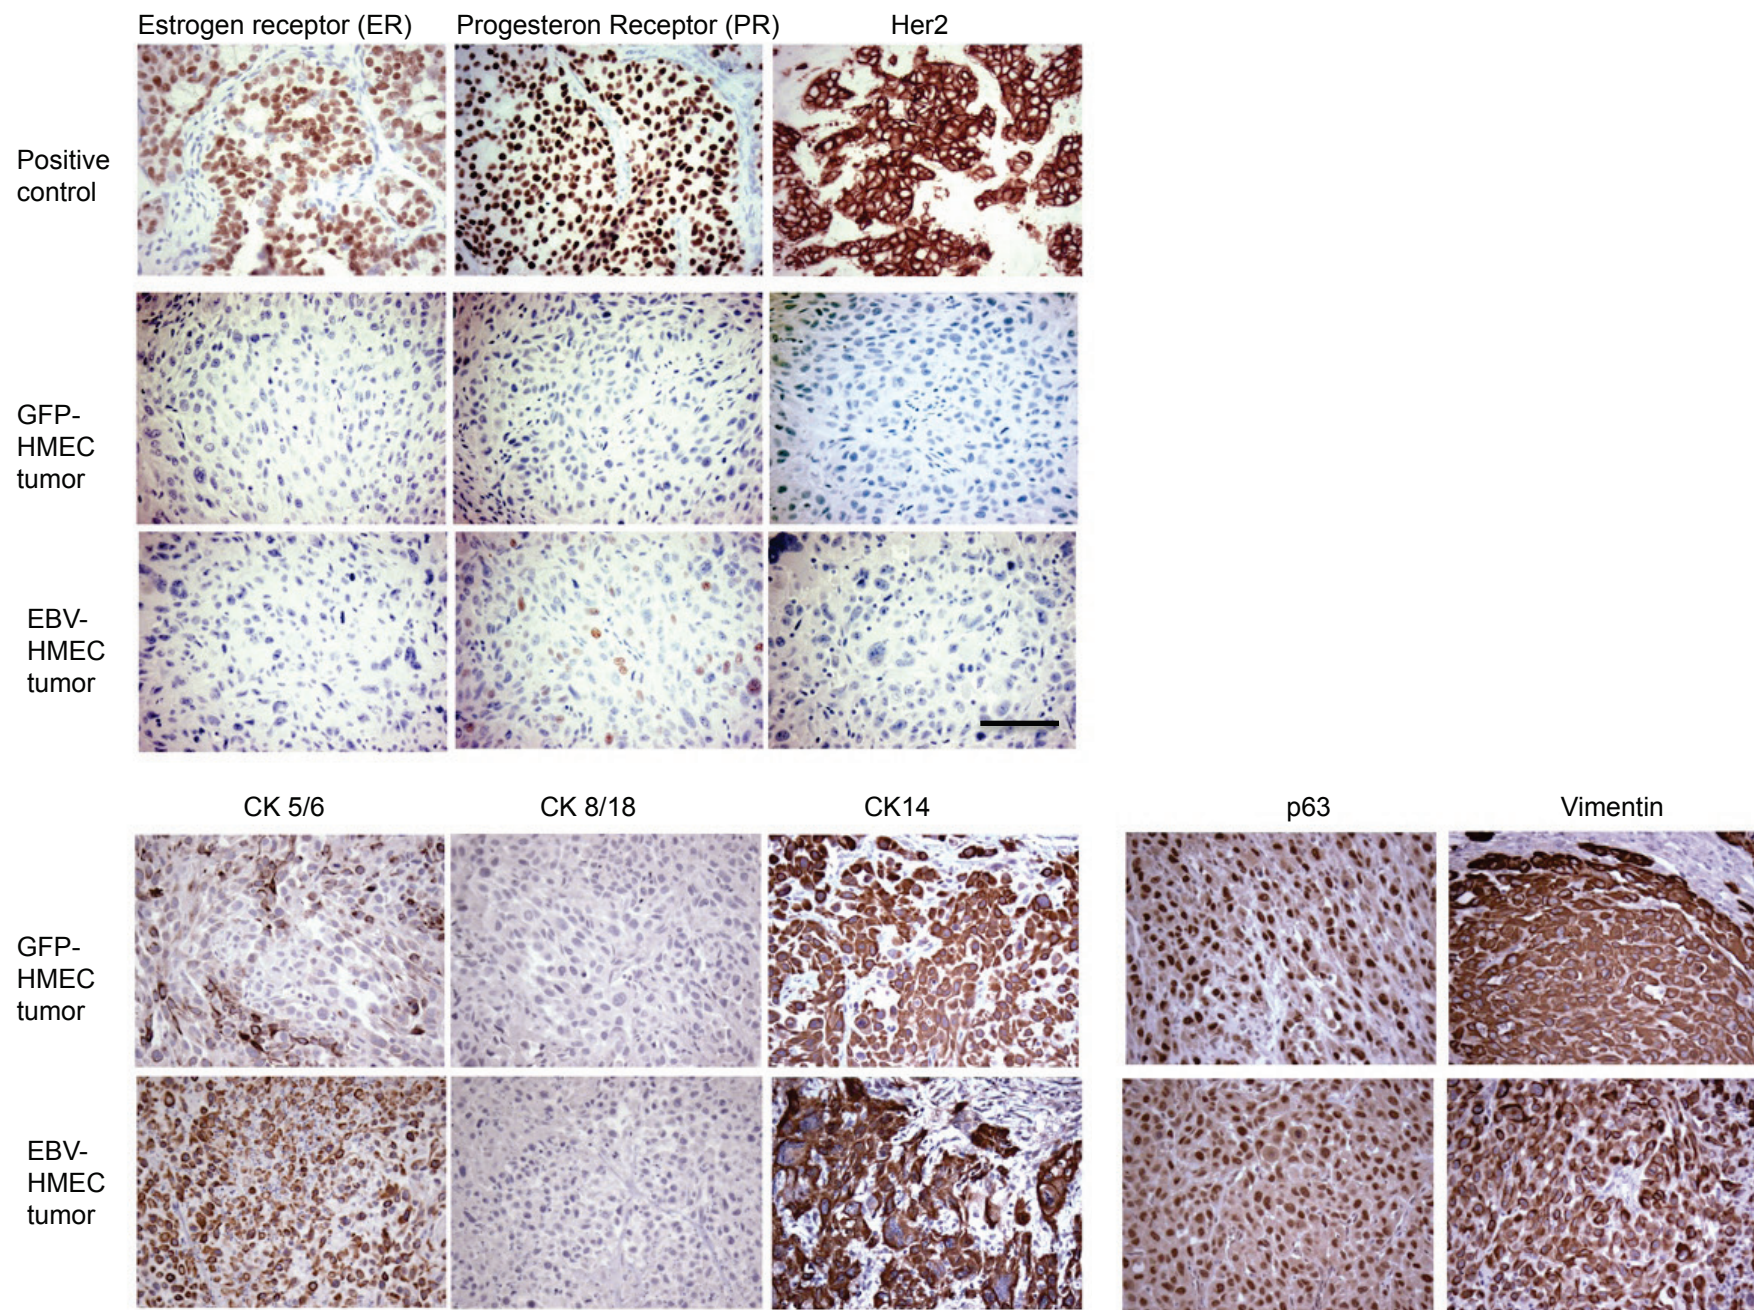

Fig. S 3

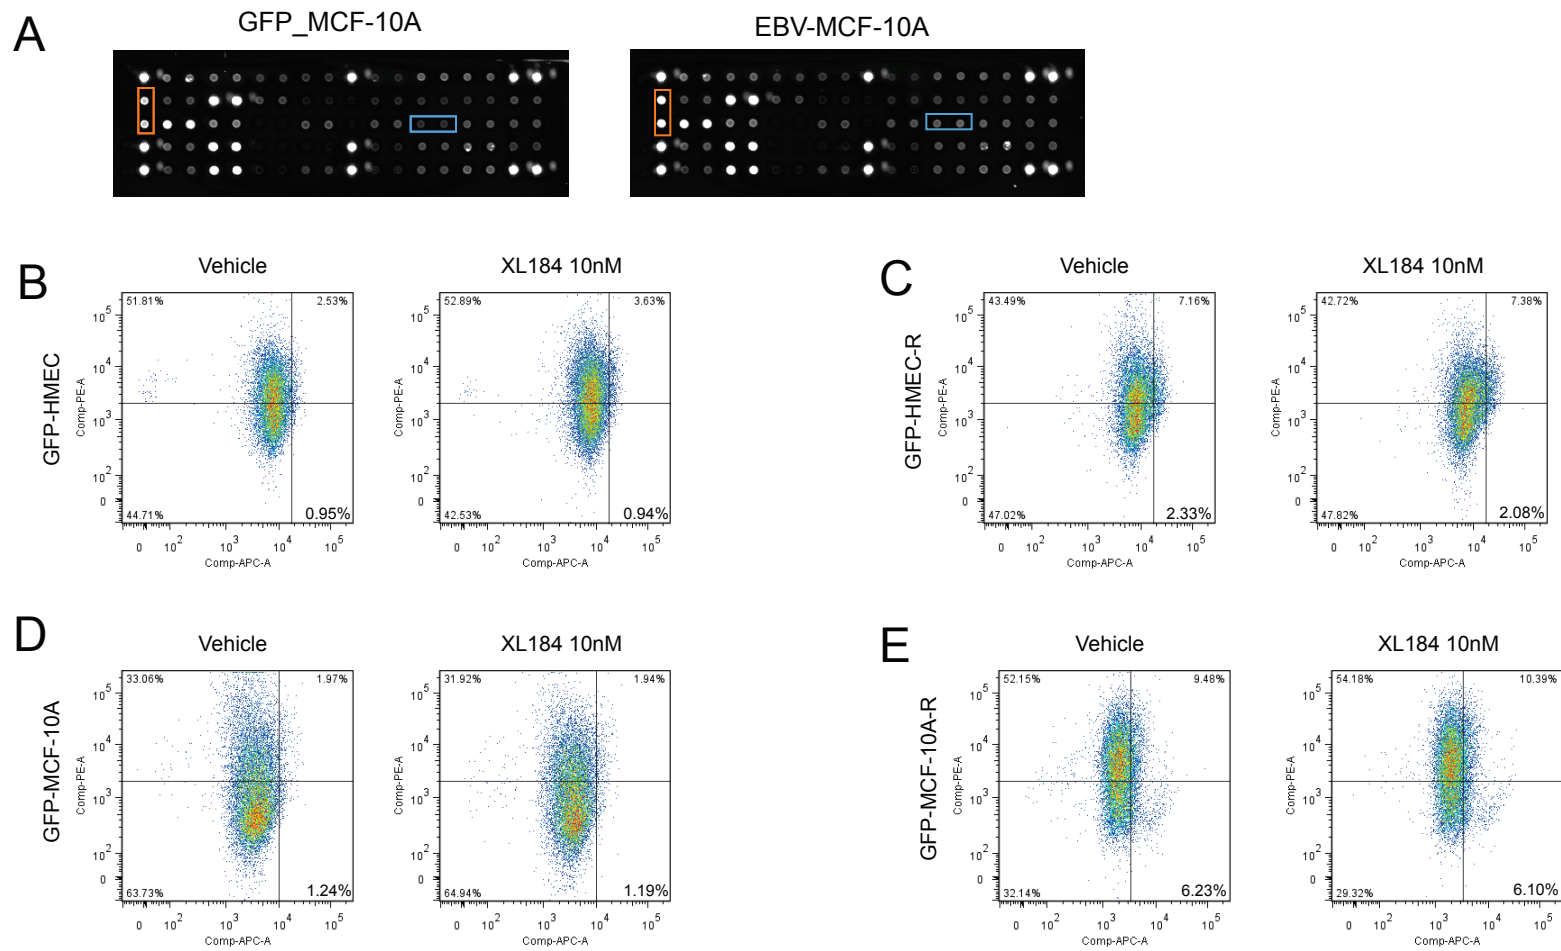

Fig. S4

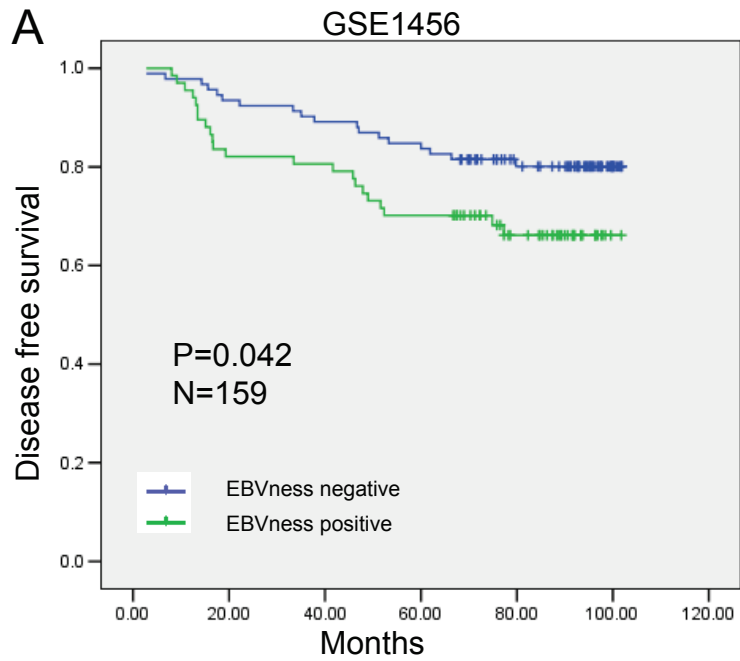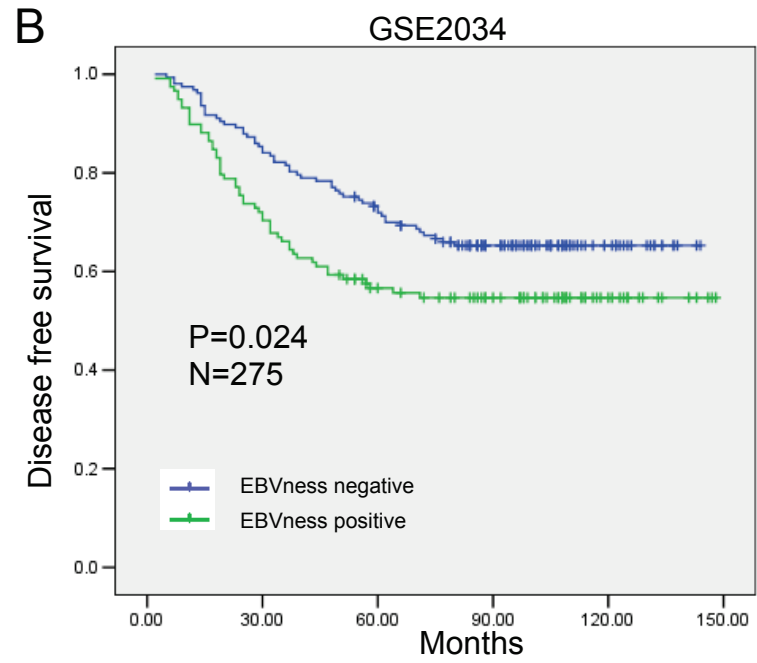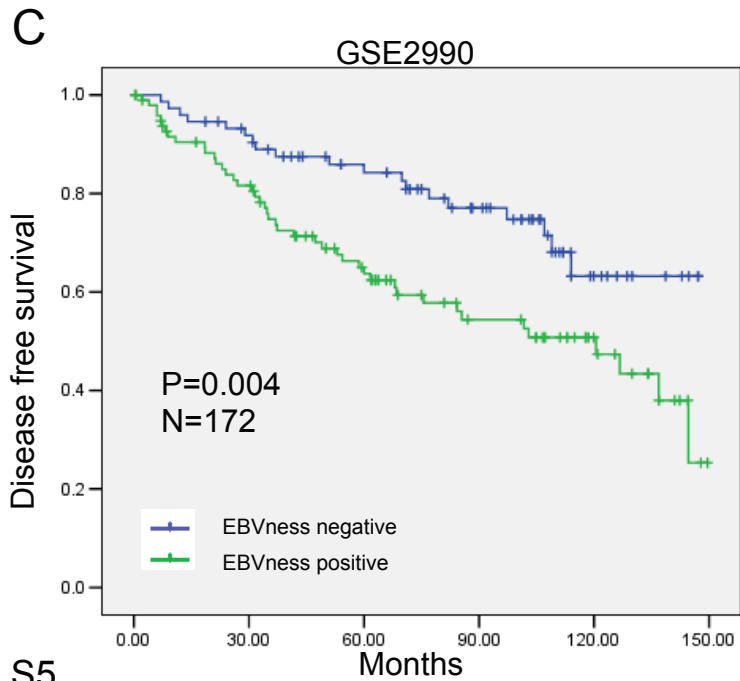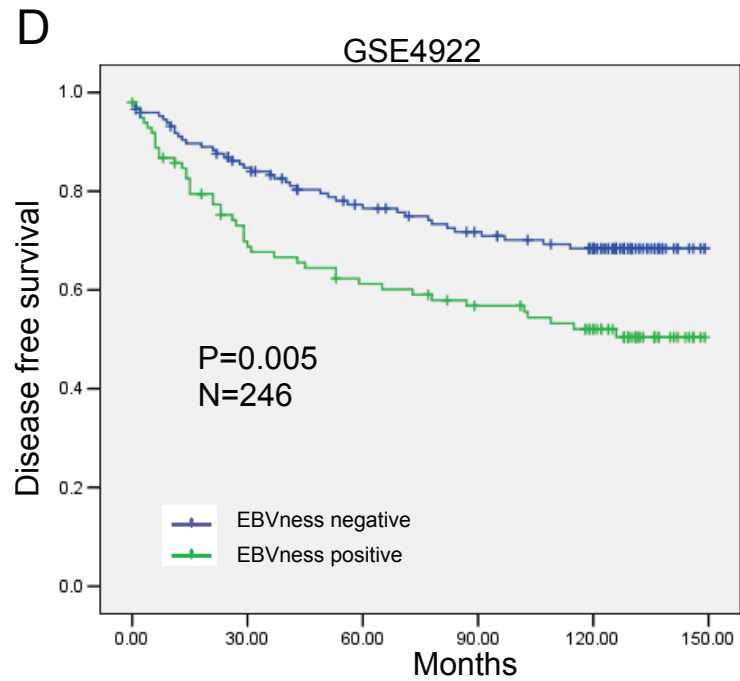

Fig. S5

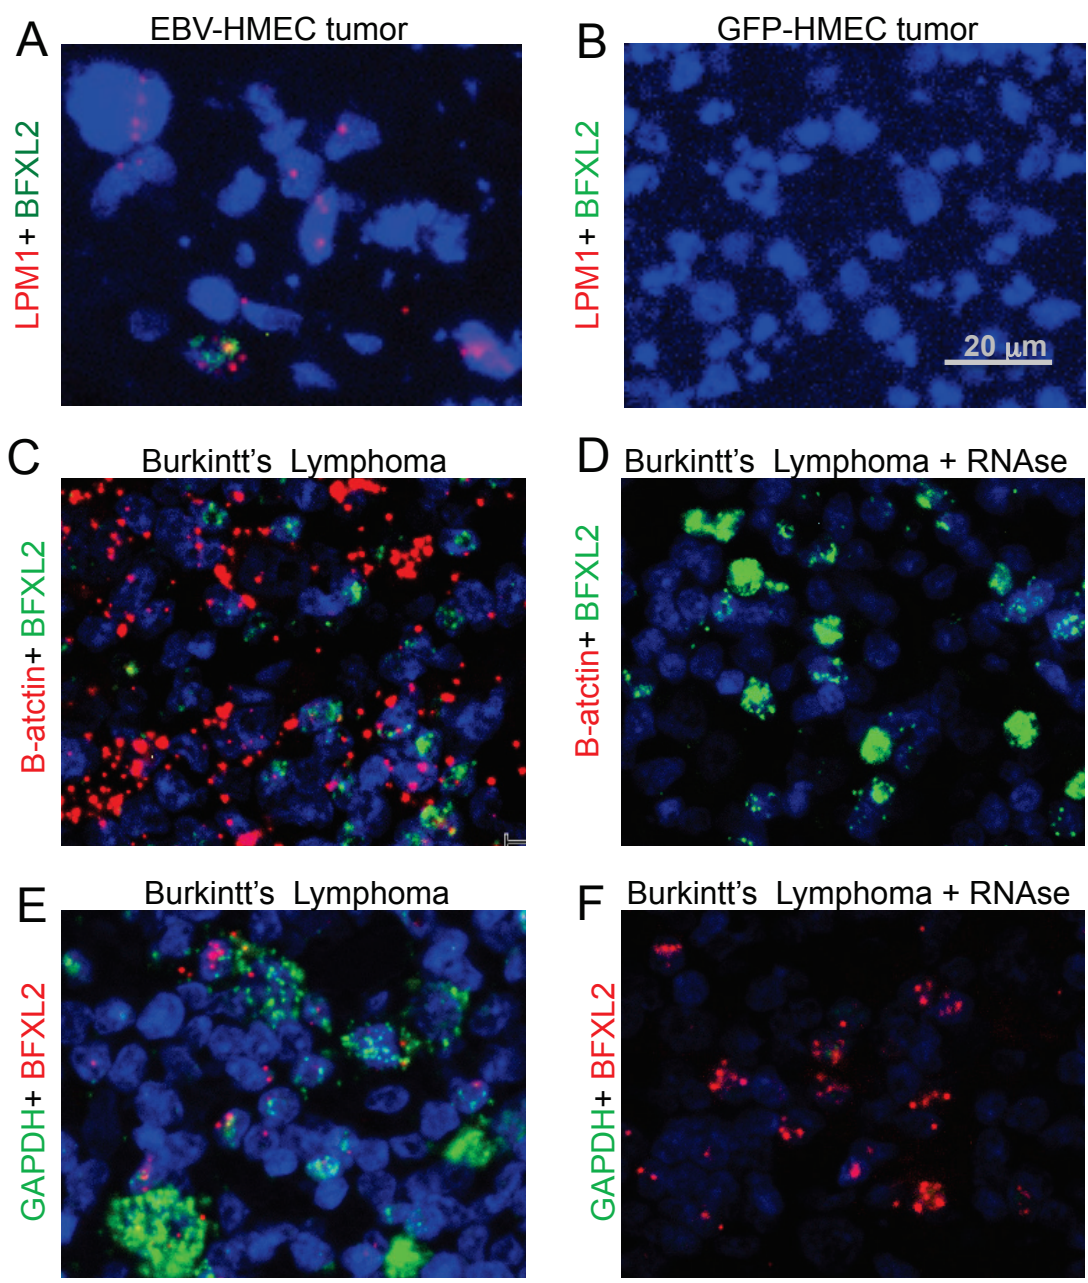

Fig. S6

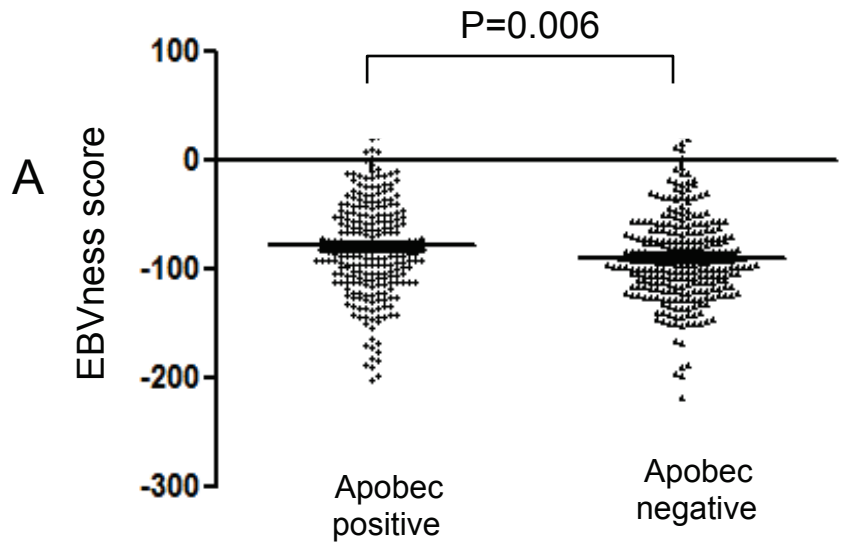

B

| Apobec   | EBVness positive | EBVness negative |
|----------|------------------|------------------|
| Positive | 132              | 117              |
| Negative | 113              | 159              |

$P=0.01$

Fig. S7

Table S1

|    | Symbol   | ProbeSet        | Fold-change | Parametric p-value | Name                                                                   |
|----|----------|-----------------|-------------|--------------------|------------------------------------------------------------------------|
| 1  | ABCE1    | 201873_PM_s_at  | 1.61        | 0.0007744          | ATP-binding cassette, sub-family E (OABP), member 1                    |
| 2  | ATAD2    | 228401_PM_at    | 1.85        | 0.0005267          | ATPase family, AAA domain containing 2                                 |
| 3  | BBS1     | 218471_PM_s_at  | 0.57        | 0.000952           | Bardet-Biedl syndrome 1                                                |
| 4  | BCCIP    | 227896_PM_at    | 2.08        | 0.0009491          | BRCA2 and CDKN1A interacting protein                                   |
| 5  | C1orf85  | 1558693_PM_s_at | 0.52        | 0.0002984          | chromosome 1 open reading frame 85                                     |
| 6  | C9orf41  | 228324_PM_at    | 1.69        | 0.0001057          | chromosome 9 open reading frame 41                                     |
| 7  | CBLL1    | 227187_PM_at    | 1.45        | 0.0001082          | Cas-Br-M (murine) ecotropic retroviral transforming sequence-like 1    |
| 8  | CCBE1    | 242324_PM_x_at  | 2.08        | 0.0008049          | collagen and calcium binding EGF domains 1                             |
| 9  | CCNC     | 201955_PM_at    | 1.89        | 5.60E-05           | cyclin C                                                               |
| 10 | COMMD10  | 222637_PM_at    | 1.85        | 0.0007051          | COMM domain containing 10                                              |
| 11 | CPSF2    | 225994_PM_at    | 1.69        | 1.97E-05           | cleavage and polyadenylation specific factor 2, 100kDa                 |
| 12 | DDX18    | 205763_PM_s_at  | 2.04        | 1.43E-05           | DEAD (Asp-Glu-Ala-Asp) box polypeptide 18                              |
| 13 | c2orf3   | 216305_PM_s_at  | 1.69        | 8.36E-05           | chromosome 2 open reading frame 3                                      |
| 14 | HCFC1R1  | 45714_PM_at     | 0.57        | 8.41E-05           | host cell factor C1 regulator 1 (XPO1 dependent)                       |
| 15 | IDH3A    | 202070_PM_s_at  | 1.89        | 0.0005737          | isocitrate dehydrogenase 3 (NAD+) alpha                                |
| 16 | IGFBP2   | 202718_PM_at    | 0.16        | 0.0002672          | insulin-like growth factor binding protein 2, 36kDa                    |
| 17 | KIAA1217 | 1554438_PM_at   | 1.92        | 0.0005928          | KIAA1217                                                               |
| 18 | LACTB    | 1552485_PM_at   | 1.47        | 0.0008129          | lactamase, beta                                                        |
| 19 | MALT1    | 208309_PM_s_at  | 2.32        | 0.000812           | mucosa associated lymphoid tissue lymphoma translocation gene 1        |
| 20 | MBD1     | 208595_PM_s_at  | 1.82        | 0.0005863          | methyl-CpG binding domain protein 1                                    |
| 21 | MBP      | 1554544_PM_a_at | 2.63        | 0.0006908          | myelin basic protein                                                   |
| 22 | MDP1     | 228763_PM_at    | 0.57        | 0.0004547          | magnesium-dependent phosphatase 1                                      |
| 23 | ME2      | 210154_PM_at    | 4.34        | 0.0007043          | malic enzyme 2, NAD(+)-dependent, mitochondrial                        |
| 24 | MOBKL2B  | 226844_PM_at    | 2.85        | 0.0006736          | MOB1, Mps One Binder kinase activator-like 2B (yeast)                  |
| 25 | MYO1B    | 212365_PM_at    | 2.04        | 0.0007291          | myosin IB                                                              |
| 26 | NEDD4    | 213012_PM_at    | 2.27        | 0.000822           | neural precursor cell expressed, developmentally down-regulated 4      |
| 27 | NEDD4L   | 212445_PM_s_at  | 3.22        | 0.0009354          | neural precursor cell expressed, developmentally down-regulated 4-like |
| 28 | NOL11    | 221970_PM_s_at  | 1.67        | 7.30E-05           | nucleolar protein 11                                                   |
| 29 | PIAS2    | 1555514_PM_a_at | 2           | 0.0007738          | protein inhibitor of activated STAT, 2                                 |
| 30 | PIAS3    | 203035_PM_s_at  | 0.61        | 0.0004053          | protein inhibitor of activated STAT, 3                                 |
| 31 | PSMD12   | 202352_PM_s_at  | 1.78        | 0.0009601          | proteasome (prosome, macropain) 26S subunit, non-ATPase, 12            |
| 32 | RAB3IP   | 223471_PM_at    | 1.69        | 6.74E-05           | RAB3A interacting protein (rabin3)                                     |
| 33 | RBM26    | 229433_PM_at    | 1.69        | 0.0002696          | RNA binding motif protein 26                                           |
| 34 | RNF138   | 218738_PM_s_at  | 3.33        | 0.0001565          | ring finger protein 138                                                |
| 35 | SDC3     | 202898_PM_at    | 0.48        | 0.0004584          | syndecan 3                                                             |
| 36 | SERPINB1 | 213572_PM_s_at  | 3.44        | 0.0003976          | serpin peptidase inhibitor, clade B (ovalbumin), member 1              |
| 37 | SPG20    | 212526_PM_at    | 1.54        | 0.0002159          | spastic paraplegia 20 (Troyer syndrome)                                |
| 38 | TNFAIP3  | 202643_PM_s_at  | 2.94        | 0.0007594          | tumor necrosis factor, alpha-induced protein 3                         |
| 39 | TP53TG1  | 210886_PM_x_at  | 0.56        | 0.0006349          | TP53 target 1 (non-protein coding)                                     |
| 40 | UCHL5    | 219960_PM_s_at  | 1.92        | 0.0009459          | ubiquitin carboxyl-terminal hydrolase L5                               |
| 41 | USP38    | 223289_PM_s_at  | 1.54        | 0.0006159          | ubiquitin specific peptidase 38                                        |
| 42 | UTP18    | 203721_PM_s_at  | 1.56        | 0.0001414          | UTP18 small subunit (SSU) processome component homolog (yeast)         |
| 43 | VRK2     | 205126_PM_at    | 1.92        | 0.0008034          | vaccinia related kinase 2                                              |
| 44 | WRN      | 205667_PM_at    | 1.75        | 0.0005584          | Werner syndrome, RecQ helicase-like                                    |
| 45 | XPO4     | 218479_PM_s_at  | 1.85        | 0.0007639          | exportin 4                                                             |
| 46 | ZNF165   | 206683_PM_at    | 2.22        | 0.0009119          | zinc finger protein 165                                                |
| 47 | ZNF503   | 227195_PM_at    | 0.47        | 7.17E-05           | zinc finger protein 503                                                |



Table S2

|    | Biocarta Pathway  | Pathway description                                                              | Number of genes targeted | LS permutation p-value | KS permutation p-value | Efron-Tibshirani's GSA test p-value |
|----|-------------------|----------------------------------------------------------------------------------|--------------------------|------------------------|------------------------|-------------------------------------|
| 1  | h_myosinPathway   | PKC-catalyzed phosphorylation of inhibitory phosphoprotein of myosin phosphatase | 17                       | 0.00008                | 0.00013                | 0.01 (+)                            |
| 2  | h_Par1Pathway     | Thrombin signaling and protease-activated receptors                              | 27                       | 0.00113                | 0.00351                | 0.03 (+)                            |
| 3  | h_igf1mtorpathway | Skeletal muscle hypertrophy is regulated via AKT/mTOR pathway                    | 30                       | 0.00258                | 0.00102                | 0.065 (+)                           |
| 4  | h_ifngPathway     | IFN gamma signaling pathway                                                      | 7                        | 0.00289                | 0.0136                 | < 0.005 (+)                         |
| 5  | h_hesPathway      | Segmentation Clock                                                               | 11                       | 0.00819                | 0.00049                | 0.01 (-)                            |
| 6  | h_alkPathway      | ALK in cardiac myocytes                                                          | 36                       | 0.00844                | 0.01833                | 0.08 (+)                            |
| 7  | h_ps1Pathway      | Presenilin action in Notch and Wnt signaling                                     | 15                       | 0.00861                | 0.01808                | 0.07 (-)                            |
| 8  | h_TPOPathway      | TPO Signaling Pathway                                                            | 24                       | 0.00909                | 0.03894                | 0.015 (+)                           |
| 9  | h_vobesityPathway | Visceral Fat Deposits and the Metabolic Syndrome                                 | 6                        | 0.01019                | 0.00554                | 0.035 (-)                           |
| 10 | h_asbcellPathway  | Antigen Dependent B Cell Activation                                              | 5                        | 0.01324                | 0.00069                | 0.045 (+)                           |
| 11 | h_bbcclPathway    | Bystander B Cell Activation                                                      | 5                        | 0.01324                | 0.00069                | 0.045 (+)                           |
| 12 | h_egfPathway      | EGF Signaling Pathway                                                            | 38                       | 0.01355                | 0.00471                | < 0.005 (+)                         |
| 13 | h_metPathway      | Signaling of Hepatocyte Growth Factor Receptor                                   | 47                       | 0.01955                | 0.00494                | 0.015 (+)                           |
| 14 | h_il6Pathway      | IL 6 signaling pathway                                                           | 26                       | 0.02135                | 0.00749                | 0.085 (+)                           |
| 15 | h_hSWI-SNFpathway | Chromatin Remodeling by hSWI/SNF ATP-dependent Complexes                         | 16                       | 0.03102                | 0.00299                | 0.065 (+)                           |
| 16 | h_pmlPathway      | Regulation of transcriptional activity by PML                                    | 10                       | 0.04157                | 0.00508                | 0.055 (+)                           |
| 17 | h_notchpathway    | Proteolysis and Signaling Pathway of Notch                                       | 8                        | 0.04249                | 0.05061                | < 0.005 (-)                         |
| 18 | h_appPathway      | Generation of amyloid b-peptide by PS1                                           | 6                        | 0.04612                | 0.00858                | 0.035 (+)                           |
| 19 | h_d4gdiPathway    | D4-GDI Signaling Pathway                                                         | 18                       | 0.05045                | 0.00952                | 0.215 (+)                           |
| 20 | h_hsp27Pathway    | Stress Induction of HSP Regulation                                               | 11                       | 0.0678                 | 0.00945                | 0.17 (-)                            |
| 21 | h_CCR3Pathway     | CCR3 signaling in Eosinophils                                                    | 17                       | 0.07119                | 0.00722                | 0.115 (+)                           |
| 22 | h_il18Pathway     | IL 18 Signaling Pathway                                                          | 5                        | 0.07965                | 0.00398                | 0.165 (-)                           |
| 23 | h_atrbrcaPathway  | Role of BRCA1, BRCA2 and ATR in Cancer Susceptibility                            | 31                       | 0.11183                | 0.00737                | 0.12 (-)                            |
| 24 | h_cytokinePathway | Cytokine Network                                                                 | 6                        | 0.15028                | 0.00431                | 0.105 (+)                           |
| 25 | h_cptPathway      | Mitochondrial Carnitine Palmitoyltransferase (CPT) System                        | 6                        | 0.17915                | 0.38451                | < 0.005 (-)                         |
| 26 | h_IL12Pathway     | IL12 and Stat4 Dependent Signaling Pathway in Th1 Development                    | 10                       | 0.18097                | 0.05016                | < 0.005 (-)                         |
| 27 | h_LairPathway     | Cells and Molecules involved in local acute inflammatory response                | 13                       | 0.20518                | 0.00933                | 0.13 (+)                            |
| 28 | h_lymphpathway    | Adhesion and Diapedesis of Lymphocytes                                           | 10                       | 0.21319                | 0.00967                | 0.14 (+)                            |
| 29 | h_RNApol3Pathway  | RNA polymerase III transcription                                                 | 7                        | 0.31772                | 0.14816                | < 0.005 (-)                         |
| 30 | h_ahspPathway     | Hemoglobin@                                                                      | 9                        | 0.38274                | 0.24416                | 0.005 (-)                           |
| 31 | h_reckPathway     | Inhibition of Matrix Metalloproteinases                                          | 13                       | 0.52352                | 0.38059                | < 0.005 (-)                         |
| 32 | h_il3Pathway      | IL 3 signaling pathway                                                           | 7                        | 0.57286                | 0.88897                | < 0.005 (-)                         |
| 33 | h_smPathway       | Spliceosomal Assembly                                                            | 11                       | 0.64876                | 0.45707                | 0.005 (-)                           |
| 34 | h_btg2Pathway     | BTG family proteins and cell cycle regulation                                    | 13                       | 0.84872                | 0.92699                | < 0.005 (-)                         |

Table S3

|    | Biocarta Pathway     | Pathway description                                                    | Number of genes targeted | LS permutation p-value | KS permutation p-value | Efron-Tibshirani's GSA test p-value |
|----|----------------------|------------------------------------------------------------------------|--------------------------|------------------------|------------------------|-------------------------------------|
| 1  | h_ranMSpathway       | Role of Ran in mitotic spindle regulation                              | 13                       | 0.00002                | 0.00001                | < 0.005 (+)                         |
| 2  | h_g1Pathway          | Cell Cycle: G1/S Check Point                                           | 42                       | 0.00016                | 0.08536                | < 0.005 (+)                         |
| 3  | h_cdc25Pathway       | cdc25 and chk1 Regulatory Pathway in response to DNA damage            | 11                       | 0.00032                | 0.01271                | < 0.005 (+)                         |
| 4  | h_ephA4Pathway       | Eph Kinases and ephrins support platelet aggregation                   | 12                       | 0.00069                | 0.00011                | < 0.005 (-)                         |
| 5  | h_ranbp2Pathway      | Sumoylation by RanBP2 Regulates Transcriptional Repression             | 14                       | 0.0013                 | 0.20691                | < 0.005 (+)                         |
| 6  | h_tgfbPathway        | TGF beta signaling pathway                                             | 24                       | 0.00133                | 0.32886                | 0.03 (+)                            |
| 7  | h_mcmPathway         | CDK Regulation of DNA Replication                                      | 19                       | 0.0019                 | 0.02509                | 0.04 (+)                            |
| 8  | h_srcRPTPPathway     | Activation of Src by Protein-tyrosine phosphatase alpha                | 13                       | 0.00523                | 0.30397                | < 0.005 (+)                         |
| 9  | h_asbcellPathway     | Antigen Dependent B Cell Activation                                    | 5                        | 0.00591                | 0.02723                | < 0.005 (+)                         |
| 10 | h_bbcellPathway      | Bystander B Cell Activation                                            | 5                        | 0.00591                | 0.02723                | < 0.005 (+)                         |
| 11 | h_rbPathway          | RB Tumor Suppressor/Checkpoint Signaling in response to DNA damage     | 15                       | 0.00623                | 0.04028                | < 0.005 (+)                         |
| 12 | h_smPathway          | Spliceosomal Assembly                                                  | 11                       | 0.00851                | 0.16987                | 0.055 (+)                           |
| 13 | h_amiPathway         | Acute Myocardial Infarction                                            | 12                       | 0.00973                | 0.22781                | < 0.005 (-)                         |
| 14 | h_tob1Pathway        | Role of Tob in T-cell activation                                       | 11                       | 0.016                  | 0.20903                | < 0.005 (+)                         |
| 15 | h_fxrPathway         | FXR and LXR Regulation of Cholesterol Metabolism                       | 7                        | 0.01627                | 0.00075                | 0.07 (-)                            |
| 16 | h_hsp27Pathway       | Stress Induction of HSP Regulation                                     | 11                       | 0.01742                | 0.12518                | < 0.005 (+)                         |
| 17 | h_ptc1Pathway        | Sonic Hedgehog (SHH) Receptor Ptc1 Regulates cell cycle                | 10                       | 0.01763                | 0.19397                | < 0.005 (+)                         |
| 18 | h_ace2Pathway        | Angiotensin-converting enzyme 2 regulates heart function               | 6                        | 0.02941                | 0.55815                | < 0.005 (-)                         |
| 19 | h_npp1Pathway        | Regulators of Bone Mineralization                                      | 6                        | 0.02941                | 0.55815                | < 0.005 (-)                         |
| 20 | h_plateletAppPathway | Platelet Amyloid Precursor Protein Pathway                             | 14                       | 0.03695                | 0.41662                | < 0.005 (-)                         |
| 21 | h_LDLpathway         | Low-density lipoprotein (LDL) pathway during atherogenesis             | 6                        | 0.05778                | 0.00357                | 0.095 (-)                           |
| 22 | h_skp2e2fPathway     | E2F1 Destruction Pathway                                               | 12                       | 0.06228                | 0.23752                | < 0.005 (+)                         |
| 23 | h_akap95Pathway      | AKAP95 role in mitosis and chromosome dynamics                         | 13                       | 0.09264                | 0.25022                | 0.005 (+)                           |
| 24 | h_intrinsicPathway   | Intrinsic Prothrombin Activation Pathway                               | 9                        | 0.09286                | 0.67113                | < 0.005 (-)                         |
| 25 | h_p27Pathway         | Regulation of p27 Phosphorylation during Cell Cycle Progression        | 12                       | 0.09579                | 0.15707                | < 0.005 (+)                         |
| 26 | h_pelp1Pathway       | Pelp1 Modulation of Estrogen Receptor Activity                         | 7                        | 0.09669                | 0.0834                 | < 0.005 (+)                         |
| 27 | h_ceramidePathway    | Ceramide Signaling Pathway                                             | 27                       | 0.13267                | 0.29703                | < 0.005 (+)                         |
| 28 | h_vipPathway         | Neuropeptides VIP and PACAP inhibit the apoptosis of activated T cells | 35                       | 0.14728                | 0.7075                 | < 0.005 (-)                         |
| 29 | h_ps1Pathway         | Presenilin action in Notch and Wnt signaling                           | 15                       | 0.15846                | 0.42291                | < 0.005 (+)                         |
| 30 | h_stat3Pathway       | Stat3 Signaling Pathway                                                | 7                        | 0.21504                | 0.32375                | < 0.005 (+)                         |

Table S4

|    | ProbeSet        | Symbol   | Name                                                                   | Weight in Diagonal Linear Discriminant Analysis |
|----|-----------------|----------|------------------------------------------------------------------------|-------------------------------------------------|
| 1  | 1554544_PM_a_at | MBP      | myelin basic protein                                                   | -3.1737                                         |
| 2  | 1555514_PM_a_at | PIAS2    | protein inhibitor of activated STAT, 2                                 | -4.3098                                         |
| 3  | 201873_PM_s_at  | ABCE1    | ATP-binding cassette, sub-family E (OABP), member 1                    | -6.3593                                         |
| 4  | 201955_PM_at    | CCNC     | cyclin C                                                               | -8.4285                                         |
| 5  | 202070_PM_s_at  | IDH3A    | isocitrate dehydrogenase 3 (NAD+) alpha                                | -5.1207                                         |
| 6  | 202352_PM_s_at  | PSMD12   | proteasome (prosome, macropain) 26S subunit, non-ATPase, 12            | -4.9795                                         |
| 7  | 202644_PM_s_at  | TNFAIP3  | tumor necrosis factor, alpha-induced protein 3                         | -4.7935                                         |
| 8  | 202718_PM_at    | IGFBP2   | insulin-like growth factor binding protein 2, 36kDa                    | 2.0252                                          |
| 9  | 202898_PM_at    | SDC3     | syndecan 3                                                             | 4.6527                                          |
| 10 | 203035_PM_s_at  | PIAS3    | protein inhibitor of activated STAT, 3                                 | 7.1677                                          |
| 11 | 203721_PM_s_at  | UTP18    | UTP18 small subunit (SSU) processome component homolog (yeast)         | -10.36                                          |
| 12 | 205126_PM_at    | VRK2     | vaccinia related kinase 2                                              | -4.5849                                         |
| 13 | 205667_PM_at    | WRN      | Werner syndrome, RecQ helicase-like                                    | -5.7498                                         |
| 14 | 206683_PM_at    | ZNF165   | zinc finger protein 165                                                | -3.6134                                         |
| 15 | 208309_PM_s_at  | MALT1    | mucosa associated lymphoid tissue lymphoma translocation gene 1        | -3.4562                                         |
| 16 | 208595_PM_s_at  | MBD1     | methyl-CpG binding domain protein 1                                    | -5.3362                                         |
| 17 | 208896_PM_at    | DDX18    | DEAD (Asp-Glu-Ala-Asp) box polypeptide 18                              | -7.8428                                         |
| 18 | 210153_PM_s_at  | ME2      | malic enzyme 2, NAD(+)-dependent, mitochondrial                        | -2.7999                                         |
| 19 | 210886_PM_x_at  | TP53TG1  | TP53 target 1 (non-protein coding)                                     | 5.5011                                          |
| 20 | 212365_PM_at    | MYO1B    | myosin IB                                                              | -4.2106                                         |
| 21 | 212445_PM_s_at  | NEDD4L   | neural precursor cell expressed, developmentally down-regulated 4-like | -2.424                                          |
| 22 | 212526_PM_at    | SPG20    | spastic paraplegia 20 (Troyer syndrome)                                | -9.7634                                         |
| 23 | 213012_PM_at    | NEDD4    | neural precursor cell expressed, developmentally down-regulated 4      | -3.5315                                         |
| 24 | 213572_PM_s_at  | SERPINB1 | serpin peptidase inhibitor, clade B (ovalbumin), member 1              | -2.7943                                         |
| 25 | 216305_PM_s_at  | C2orf3   | GC-rich sequence DNA-binding factor 2                                  | -9.4529                                         |
| 26 | 218471_PM_s_at  | BBS1     | Bardet-Biedl syndrome 1                                                | 5.1307                                          |
| 27 | 218479_PM_s_at  | XPO4     | exportin 4                                                             | -4.8683                                         |
| 28 | 218738_PM_s_at  | RNF138   | ring finger protein 138                                                | -3.527                                          |
| 29 | 219960_PM_s_at  | UCHL5    | ubiquitin carboxyl-terminal hydrolase L5                               | -4.3732                                         |
| 30 | 221970_PM_s_at  | NOL11    | nucleolar protein 11                                                   | -10.32                                          |
| 31 | 222637_PM_at    | COMMD10  | COMM domain containing 10                                              | -4.9854                                         |
| 32 | 226844_PM_at    | MOBKL2B  | MOB kinase activator 3B                                                | -2.9023                                         |
| 33 | 227187_PM_at    | CBLL1    | Cas-Br-M (murine) ecotropic retroviral transforming sequence-like 1    | -13.986                                         |
| 34 | 227896_PM_at    | BCCIP    | BRCA2 and CDKN1A interacting protein                                   | -3.9048                                         |
| 35 | 228401_PM_at    | ATAD2    | ATPase family, AAA domain containing 2                                 | -5.4483                                         |
| 36 | 229433_PM_at    | RBM26    | RNA binding motif protein 26                                           | -7.4851                                         |
| 37 | 45714_PM_at     | HCF1R1   | host cell factor C1 regulator 1 (XPO1 dependent)                       | 8.9825                                          |

Table S5

| Character                 | EBV-like       | None-EBV-like  | P value |
|---------------------------|----------------|----------------|---------|
| GSE1456                   |                |                |         |
| Basal like tumor          | 28.6%: (20/70) | 5.6% (5/89)    | <0.001  |
| GSE2290                   |                |                |         |
| Grade(3)                  | 45.2%(38/84)   | 15.1% (11/73)  | <0.001  |
| Lymph node metastasis (+) | 19.1%(18/94)   | 16.2% (12/74)  | 0.632   |
| M Stage (1)               | 55.1% (32/58)  | 44.7% (38/85)  | <0.221  |
| Average tumor size        | 23.98mm(96)    | 19.18mm(76)    | 0.01    |
| ER (-)                    | 25.5%(24/94)   | 6.8%(5/74)     | <0.001  |
| Age                       | 58(96)         | 56.3(76)       | 0.313   |
| GSE2034                   |                |                |         |
| M Stage (1)               | 55.1%(32/58)   | 44.7% (38/85)  | 0.221   |
| ER (-)                    | 43.3%(52/120)  | 13.5%(21/155)  | <0.001  |
| GSE4922                   |                |                |         |
| Grade(3)                  | 35.6%(37/104)  | 12.7% (18/142) | P<0.001 |
| Lymph node metastasis (+) | 45.1%(47/104)  | 28.8%(41/142)  | 0.008   |
| Average tumor size        | 23.73mm(96)    | 21.43mm(76)    | 0.012   |
| ER (-)                    | 24%(25/104)    | 9.15%(13/142)  | 0.001   |
| P53 mutation              | 37.5% (39/104) | 14.9% (21/142) | <0.001  |
| Age(year)                 | 59(104)        | 64.4(142)      | 0.005   |
